# Supplementary material for: A Genetic Screen Based on in Vivo RNA Imaging Reveals Centrosome-Independent Mechanisms for Localizing gurken Transcripts in Drosophila
Source: PubMed Central journal article supplement (PMC4059244; doi:10.1534/g3.114.010462), 2014-02-14
Supplement: supp_g3.114.010462_FileS1.pdf [file supp_g3.114.010462_FileS1.pdf]

## File S1

### METHODS

#### Fly stocks

The following *Drosophila melanogaster* fly stocks were used: *w*; *P{FRT(w[hs])}2A*; *w*; *P{ovo<sup>D1-18</sup>}3L1 P{FRT(w[hs])}2A*; *y w P{hsFLP}1*; *w/Dp(2;Y)G, P{hs-hid}Y*; *ru h th st cu sr e ca (rucuca)*; *w*; *Dr<sup>Mio</sup>/TM3, P{gal4-twi.G} P{UAS::2xEGFP}AH2.3*, *Sb Ser* from the Bloomington stock center; two copies of *grk(MS2)<sub>12</sub>* transgenes on 2<sup>nd</sup> chromosome from Trudi Schüpbach; *nos::MCP-mCherry* (this study). (In the course of these experiments we mapped the insertion site of *P{hsFLP}1* to just upstream of the *merlin* gene at 18E.) As recombinants had to include an *FRT* site for phenotypic analysis, we generated a recombinant *ru h th st FRT2A* chromosome from the sequenced *FRT2A* and *rucuca* chromosomes (Figure 2C), using SNP markers to identify a line which had recombined closest to the *FRT* site.

Other fly stocks used: *Df(3L)E1* for *armi*; *Df(3L)ED4674* for *scaf6*; *Df(3L)Exel6087* for *half pint*; *qm<sup>L14.4</sup>*; *kIc<sup>8ex94</sup>* from Bloomington stock centre; *PBac{RB}CG16838<sup>e01159</sup>* from Harvard stock collection; *spn-C<sup>094</sup>* from Daniel St. Johnston; *Tsc2<sup>192.1</sup>* from Nic Tapon; *BB142-lacZ* enhancer trap from Trudi Schüpbach.

Pacman genomic clone *CH322-104B15* was obtained from BACPAC Resource Center in Oakland and the transgenic flies were made by BestGene Inc. using the *attP* site at 28E7 (*PBac{y+attP-3B}VK00002*; Venken *et al.* 2009).

Enquiries regarding mutant stocks and the sequence analysis software described in this paper should be directed to Rippei Hayashi <ripei.hayashi@imba.oeaw.ac.at>.

#### Construction of transgene

The promoter and 5'UTR of *nanos* gene (*nanos-5'*) were amplified from *nos-Gal4-VP16* plasmid (Van Doren *et al.* 1998) and subcloned into *pBluescript-II* using *Bam*HI and *Kpn*I sites. A linker sequence was added downstream of *Kpn*I to make *Not*I site. *Bam*HI-*nanos-5'-Kpn*I-*Not*I was cut and cloned into *pCaSpeR-2* using *Bam*HI and *Not*I sites. *K10-3'*, which contains the region that stabilises the transcript in germline, but lacks the stem-loop that localises the transcript into the oocyte, was amplified from *pUASp* plasmid (Serano *et al.* 1994; Rorth 1998) and inserted downstream of *nanos-5'* using *Not*I and *Eco*RI sites to make *pCaSpeR-2-nanos-5'-Kpn*I-*Not*I-*K10-3'*. *NLS-MCP* was amplified from *hsp83-MCP-GFP* flies (Forrest and Gavis 2003) and subcloned into *pUASp* using *Kpn*I and *Bam*HI sites. *mCherry* (Shaner *et al.* 2004) was inserted downstream of *NLS-MCP* using *Bam*HI and *Not*I sites. The sequence encoding FLAG peptide was added to the C-terminal of mCherry by PCR and *Kpn*I-*NLS-MCP-mCherry-FLAG-blunt* was ligated to *pCaSpeR-2-nanos-5'-Kpn*I-*Not*I-*K10-3'*, which had been cut by *Not*I and blunted with the Klenow fragment of DNA polymerase, followed by *Kpn*I digestion, to finally obtain *pCaSpeR-2-nanos-5'-MCP-mCherry-K10-3'*. *nanos-5'-MCP-mCherry-K10-3'* transgenic flies were generated by standard protocol by selecting *w<sup>r</sup>*.

#### Mutagenesis and screen method

1-3 days old isogenic *FRT2A* males were starved for 2-4 h before being fed overnight with 25 mM EMS (Sigma) in 1% sucrose. Mutagenized males were mated for three days with *w*; *TM3, Sb/TM6B, Tb* virgin females after 24 h recovery from mutagenesis. Single *w*; *\*FRT2A/TM3 Sb or TM6 Tb* virgin females were mated with *hsFLP, nos::MCP-mCherry; grk(MS2)<sub>12</sub>; P{ovo<sup>D1</sup>} FRT2A/Sb or TM3, Ser* tester males (\* indicates mutagenized chromosome.). Tester males were maintained by crossing them to *hsFLP, nos::MCP-mCherry; grk(MS2)<sub>12</sub>; Sb/TM3, Ser* virgin females. Progeny were heat-shocked for 3 h in a 37°C incubator on each of three consecutive days during larval and pupal stages.

#### Preparation of genomic DNA for WGS

Genomic DNA was prepared from adult flies homozygous for the isogenised reference chromosomes (*FRT2A* and *rucuca*), and viable mutated *FRT2A* chromosomes. For recessive lethal mutated *FRT2A* chromosomes, homozygous embryos or larvae were selected using *TM3, Sb Ser, twi::Gal4, UAS-EGFP* (Bloomington No. 6663).

DNA was prepared using a modification of standard protocols. Briefly, 50-100 frozen adult flies were ground in 300 µl of buffer A [10 mM Tris-HCl, pH 7.5, 60 mM NaCl, 10 mM EDTA, 0.15 mM spermine, 0.15 mM spermidine, 5% sucrose, and 0.5% Triton X-100]. Cuticular debris and floating lipid were removed by centrifugation, and nuclei purified by pelleting and washes in buffer A. They were resuspended in 300 µl of buffer A, and lysed with 300 µl of 2% w/v N-lauryl sarcosine, 0.1 M EDTA, 5% sucrose, and incubation at 65°C for 45 min. Nucleic acids were extracted with phenol/chloroform and chloroform, and precipitated with sodium acetate/2-propanol. About 50 µg of DNA was obtained from 100 flies.

To purify embryonic or larval DNA, several hundred 24-36 h old unhatched eggs or 1<sup>st</sup>/2<sup>nd</sup> instar larvae were homogenized in buffer B [10 mM Tris-HCl, pH 8.0, 25 mM NaCl, and 1 mM EDTA. 1% SDS and 0.1 mg/ml of proteinase K (Roche) were added before use.] and incubated at 37°C for 1 h. SDS was precipitated with 1 M

NaOAc, and nucleic acid was recovered from the supernatant with phenol/chloroform and 2-propanol precipitation. The dried pellet was dissolved in TE containing 0.1 mg/mg RNase A (Qiagen) and incubated at 37°C for 1 h. RNase A was removed with phenol/chloroform, and DNA was precipitated with NH<sub>4</sub>OAc and 2-propanol. About 1 µg of DNA was obtained from about 300 embryos or 100 larvae.

#### **Illumina WGS and data analysis**

1 µg of purified DNA was sheared to ~300 bp in 120 µl of TE using a Covaris S2 sonicator (Covaris, Woburn, MA, USA), and libraries for Illumina sequencing were prepared according to the manufacturer's instructions. The size and the quality of DNA in the library were checked by BioAnalyser 2100 (Agilent, Santa Clara, CA, USA). Flowcell cluster formation on a cluster station and 72 bp paired-end or 36 bp single-end sequencing by synthesis on the Genetic Analyser Ix were performed according to the manufacturer's protocol. Seven and one lanes of 72 bp paired-end sequencing were run for *FRT2A* and the mutagenised lines, respectively. This sequencing showed that *FRT2A* is inserted at around 22,865k (only about 150kb proximal to *mael*). Two lanes of 36 bp single-end sequencing were run for *rucuca*.

Raw reads in FASTQ format, which were generated by the Illumina sequencing pipeline without purity filtering, were aligned to the DM3 build ([ftp://hgdownload.cse.ucsc.edu/goldenPath/currentGenomes/Drosophila\\_melanogaster/bigZips/](ftp://hgdownload.cse.ucsc.edu/goldenPath/currentGenomes/Drosophila_melanogaster/bigZips/)) of the *D. melanogaster* genome using the bwa 0.5.9 program (Li and Durbin 2009) with a maximum mismatch threshold of 2 (and a seed length of 72 or 36) and all other parameters left at the defaults. From a typical single lane of 72 bp paired-end sequencing, we obtained a total sequence of 3.3±0.5 GB (average ± S.D. of 12 sequencing runs, ~20 genome equivalents). The output Sam files were converted to pileup format using Samtools 0.1.16 (Li *et al.* 2009).

Candidate variants were identified using in-house code (details available on request), which extracts any site that carries an allele present in either the parental *FRT2A* or mutagenised line, but not both, subject to the following criteria: minimum of 7 reads in both the parental *FRT2A* and mutagenised lines, minimum of 5 instances of the "variant" allele. For frequent reads, the variant allele must also constitute at least 35% of the total reads at that site (to reveal poorly-called variants). Lowering of these threshold criteria did not increase genome coverage but increased the frequency of variant calls, suggesting that these were mainly sequencing errors. Variant positions were annotated as "transcribed region", "coding sequence", "exonic" or "intron" according to the UCSC-RefSeq database <[http:// genome.ucsc.edu/](http://genome.ucsc.edu/)>. Sequence data are accessible via Sequence Read Archive (SRA) accession number SRP037983.

#### **SNP mapping**

The length of the euchromatic region of each of the five major *Drosophila* chromosome arms is between 21.1 and 27.9 Mb (release 5, <<http://flybase.org/>>). The standard EMS protocol induces one mutation per ~400 kb, corresponding to 50-70 EMS-induced mutations per chromosome arm, and to 9-13 mutations in protein-coding regions (Misra *et al.* 2002).

To identify causative mutations, 48-96 \**FRT2A/TM3*, *Sb* or *TM6*, *Tb* F2 virgin recombinant females were individually mated with tester males carrying *TM3*, *Ser* for phenotypic retesting, SNP mapping, and to make stocks of informative recombinants (Figure 2C). DNA was extracted from individual \**FRT2A/TM3*, *Ser* F3 males by grinding in 50 µl Buffer B, and incubated for 1 h at 37°C followed by 5 min at 95°C. 0.5 µl was used for KASPAR allelic-discrimination PCR (KBiosciences; <<http://www.kbioscience.co.uk/>>), which uses PCR primers tagged with homologies to beacon DNA probes that fluoresce (FAM or VIC fluorochromes) only when extended. DNA amplification and genotyping were performed in microtiter plates (see Supplementary File S2 for a typical result). Informative F3 females (showing recombination between proximal and distal SNPs) were phenotyped as in the primary.

#### **SNPs for mapping *11R2* and *saturn*:**

61A: C97,297 in reference genome and *rucuca*; "G" in *FRT2A*.  
66F: A8,995,643 in reference genome and *rucuca*; "T" in *FRT2A*.  
69C: A12,553,021 in reference genome and *rucuca*; "T" in *FRT2A*.  
70C: G13,598,030 in reference genome and *FRT2A*; "C" in *rucuca*.  
72B: A15,920,131 in reference genome and *FRT2A*; "C" in *rucuca*.  
75F: T18,997,112 in reference genome and *rucuca*; "C" in *FRT2A*.

#### **RNA extraction and qRT-PCR:**

Germline clones of parental *FRT2A* and mutant *FRT2A* chromosomes were generated as described, and females were dissected 8-10 days after the heat-shock. RNA was extracted from 10-15 pairs of ovaries in each preparation using RNeasy columns (Qiagen). qRT-PCR was performed using Superscript III Platinum for SYBR-green one-step qRT-PCR (Invitrogen). Primers used are (5'-3'): *HetA*, GACCCCTCTCACTACCAAT and GAGGTGGACGGAGGAGAAGAC; CGCGATCTTGAAAATCTTTG and CGAACTCTGCATCACATCCT for *nanos*.

#### **Antibody staining, in situ hybridization and X-gal staining:**

Antibody staining was performed using standard techniques. Ovaries were fixed for 10 min in 1% formaldehyde for Asterless or  $\gamma$ -Tubulin detection, and 4% formaldehyde was used for other antibodies. Antibodies used were mouse IgG1 anti-Orb (1:200, DSHB 4H8), mouse IgG2a anti- $\beta$ -Galactosidase (1:1000, Promega), mouse anti-Gurken (1:200, DSHB 1D12), guinea pig anti-Traffic Jam (1:5000, gift from Dorothea Godt), rabbit anti-Asterless (1:500, gift from Jordan Raff), mouse anti-BicD (1:200, DSHB 4C2), mouse anti-Dynein heavy chain (1:200, DSHB 2C11-2), mouse anti- $\gamma$ -Tubulin (1:200, Sigma T6557), and rat anti-HA (1:500, Roche 12CA5). Phalloidin-TRITC (1:1000, Sigma) was used to stain F-actin.

In situ hybridization was performed as described in Lecuyer *et al.* (2007). Digoxigenin (DIG)-labeled probe was made from full-length *grk* cDNA (gift from Trudi Schüpbach). In situ signal was developed using fluorescein tyramide conjugate (gift from Sabine Reichert). X-gal staining was performed as described in Ashburner (1989).

#### **REFERENCES**

- Ashburner, M., 1989 *Drosophila*. Cold Spring Harbor Laboratory, Cold Spring Harbor, N.Y.
- Forrest, K. M., and E. R. Gavis, 2003 Live imaging of endogenous RNA reveals a diffusion and entrapment mechanism for nanos mRNA localization in *Drosophila*. *Curr Biol* 13: 1159-1168.
- Lecuyer, E., H. Yoshida, N. Parthasarathy, C. Alm, T. Babak *et al.*, 2007 Global analysis of mRNA localization reveals a prominent role in organizing cellular architecture and function. *Cell* 131: 174-187.
- Li, H., and R. Durbin, 2009 Fast and accurate short read alignment with Burrows-Wheeler transform. *Bioinformatics* 25: 1754-1760.
- Li, H., B. Handsaker, A. Wysoker, T. Fennell, J. Ruan *et al.*, 2009 The Sequence Alignment/Map format and SAMtools. *Bioinformatics* 25: 2078-2079.
- Misra, S., M. A. Crosby, C. J. Mungall, B. B. Matthews, K. S. Campbell *et al.*, 2002 Annotation of the *Drosophila melanogaster* euchromatic genome: a systematic review. *Genome Biol* 3: RESEARCH0083.
- Rorth, P., 1998 Gal4 in the *Drosophila* female germline. *Mech Dev* 78: 113-118.
- Serano, T. L., H. K. Cheung, L. H. Frank and R. S. Cohen, 1994 P element transformation vectors for studying *Drosophila melanogaster* oogenesis and early embryogenesis. *Gene* 138: 181-186.
- Shaner, N. C., R. E. Campbell, P. A. Steinbach, B. N. Giepmans, A. E. Palmer *et al.*, 2004 Improved monomeric red, orange and yellow fluorescent proteins derived from *Discosoma* sp. red fluorescent protein. *Nat Biotechnol* 22: 1567-1572.
- Van Doren, M., A. L. Williamson and R. Lehmann, 1998 Regulation of zygotic gene expression in *Drosophila* primordial germ cells. *Curr Biol* 8: 243-246.
- Venken, K. J., J. W. Carlson, K. L. Schulze, H. Pan, Y. He *et al.*, 2009 Versatile P[acman] BAC libraries for transgenesis studies in *Drosophila melanogaster*. *Nat Methods* 6: 431-434.
