# Supplementary material for: A Genetic Screen Based on in Vivo RNA Imaging Reveals Centrosome-Independent Mechanisms for Localizing gurken Transcripts in Drosophila
Source: PubMed Central journal article supplement (PMC4059244; doi:10.1534/g3.114.010462), 2014-02-14
Supplement: supp_g3.114.010462_FileS2.pdf [file supp_g3.114.010462_FileS2.pdf]

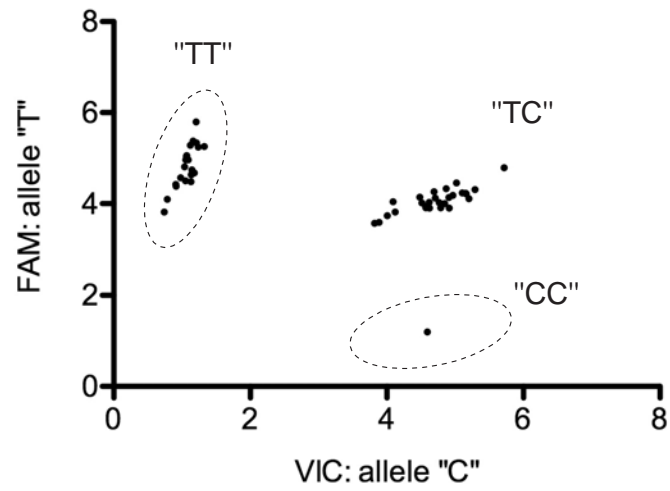

**File S2 An example of KASPAR results.** The results of KASPAR genotyping for SNP\_75F of 48 *TM3*-bearing recombinants and a control homozygous *FRT2A* fly. KASPAR results, in arbitrary units of FAM and VIC fluorescence, reveal three distinguishable clusters corresponding to the three allelic combinations [CC (control), CT (*FRT2A/TM3*), and TT(*ru h th/TM3*)].
