# Supplementary material for: A Genetic Screen Based on in Vivo RNA Imaging Reveals Centrosome-Independent Mechanisms for Localizing gurken Transcripts in Drosophila
Source: PubMed Central journal article supplement (PMC4059244; doi:10.1534/g3.114.010462), 2014-02-14
Supplement: supp_g3.114.010462_FileS3.pdf [file supp_g3.114.010462_FileS3.pdf]

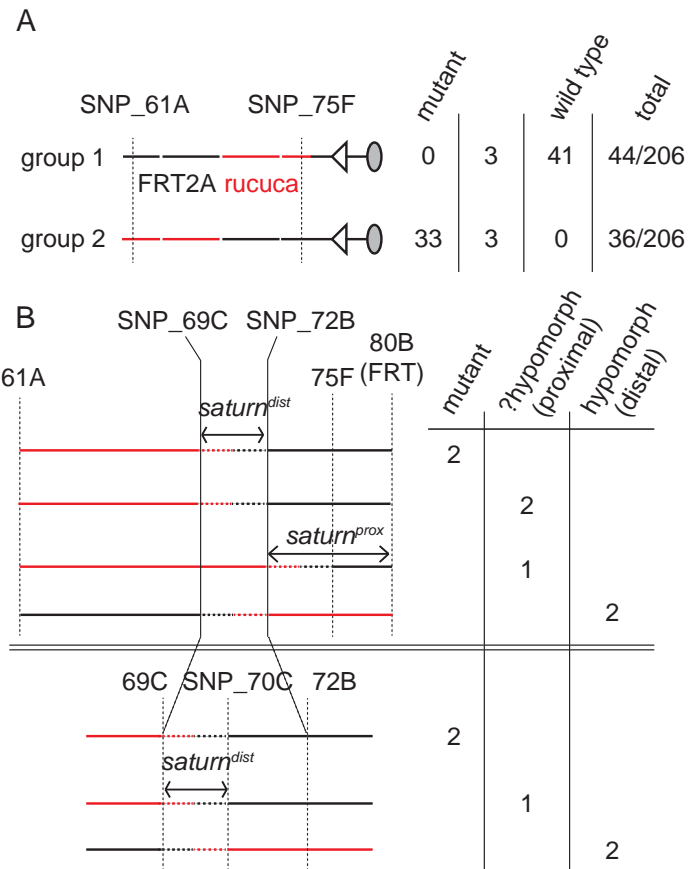

**File S3 *saturn* is caused by two mutations that are mapped to 69C-70C (*saturn<sup>dist</sup>*) and 72B-80B (*saturn<sup>prox</sup>*).** Summary of SNPs genotyping. (A) 206 putative recombinants were genotyped for the SNPs at 61A and at 75F. Non-recombinant lines (group 3) are excluded from the subsequent assays. 6/80 recombinant lines have a hypomorphic phenotype, suggesting that the presence of two closely-linked mutations near to 75F. (B) Initial second-stage genotyping reveals that *saturn<sup>dist</sup>* lies in 69C-72B and *saturn<sup>prox</sup>* mutation is between 72B and the 80B (FRT), and further genotyping places *saturn<sup>dist</sup>* mutation between 69C and 70C. WGS shows that *saturn<sup>prox</sup>* and *saturn<sup>dist</sup>* represent mutations in *klc* and *mael*, respectively (see results).
