# Supplementary material for: A Genetic Screen Based on in Vivo RNA Imaging Reveals Centrosome-Independent Mechanisms for Localizing gurken Transcripts in Drosophila
Source: PubMed Central journal article supplement (PMC4059244; doi:10.1534/g3.114.010462), 2014-02-14
Supplement: supp_g3.114.010462_FileS4.pdf [file supp_g3.114.010462_FileS4.pdf]

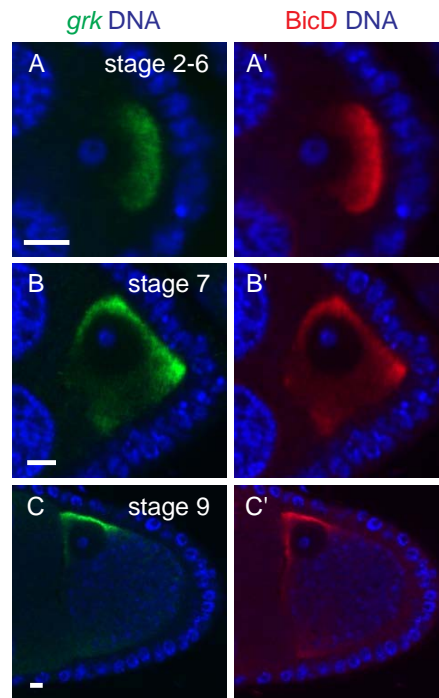

**File S4** *grk* mRNA colocalizes with BicD throughout oogenesis. Co-staining of *grk*\**mCherry* (*grk*) and the dynein cofactor BicD in stage 2-6 (A), stage 7 (B) and stage 9 (C) wildtype egg chambers, showing that *grk* mRNA colocalizes with BicD in the oocyte throughout oogenesis. Scale bars = 5  $\mu$ m
